# Supplementary material for: Assessment of irrigation physics in a land surface modeling framework using non-traditional and human-practice datasets
Source: Copernicus journal article supplement (doi:10.5194/hess-21-2953-2017), 2017-06-16
Supplement: Supplementary file 1 [file hess-21-2953-2017-supplement.pdf]

Supplement of Hydrol. Earth Syst. Sci., 21, 2953–2966, 2017  
<https://doi.org/10.5194/hess-21-2953-2017-supplement>  
© Author(s) 2017. This work is distributed under  
the Creative Commons Attribution 3.0 License.

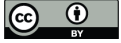

*Supplement of*

## **Assessment of irrigation physics in a land surface modeling framework using non-traditional and human-practice datasets**

**Patricia M. Lawston et al.**

*Correspondence to:* Patricia M. Lawston ([patricia.m.lawston@nasa.gov](mailto:patricia.m.lawston@nasa.gov))

The copyright of individual parts of the supplement might differ from the CC BY 3.0 License.

Supplement:

a)

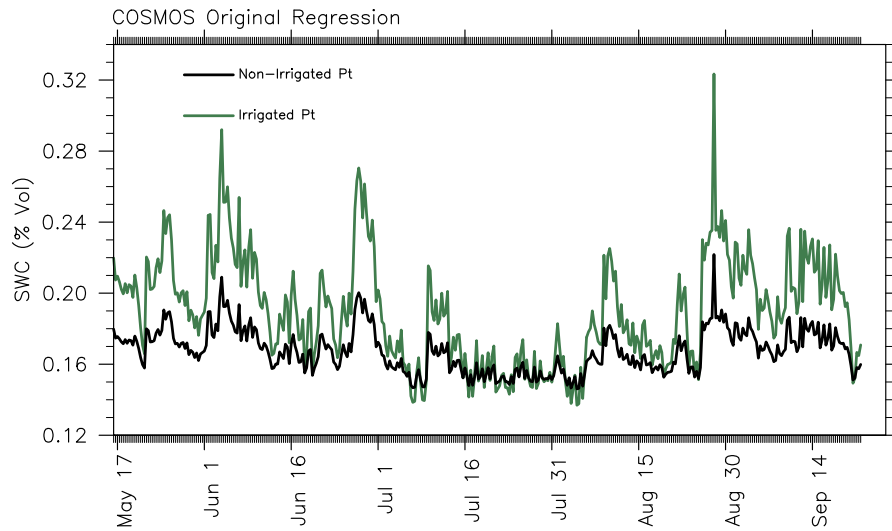

(b)

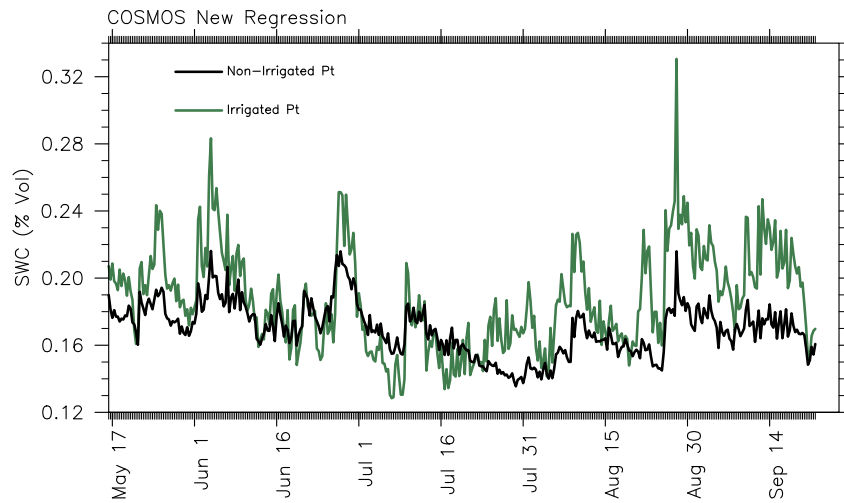

5

Supplement 1. Time series of soil water content at an irrigated and non-irrigated point given by the gridded CRNP product using (a) the original regression from Franz et al., 2015 (b) the new regression used in this study that treats irrigated and non-irrigated areas differently. With the original regression technique (a) few differences are seen between the irrigated and rainfed points, especially during the dry-down period in late July to early August. The averaging of the probes results in a levelling off of soil moisture during this time. (b) The new regression technique results in the non-irrigated point showing decreasing SWC during the dry down period, as at the CRNP rainfed probe, while the irrigated point shows increasing SWC due to irrigation during the dry down.

10
